# Supplementary material for: Expanding the utility of the dextran sulfate sodium (DSS) mouse model to induce a clinically relevant loss of intestinal barrier function
Source: PeerJ. 2020 Mar 10;8:e8681. doi: 10.7717/peerj.8681 (PMC7069414; doi:10.7717/peerj.8681)
Supplement: Supplemental Information 1 [file peerj-08-8681-s001.xlsx]

## Sheet: Histology Scoring
MOUSE COLON SCORING
Mouse ID	Inflammation	Involvement	Extent	Involvement	Regeneration	**Involvement	Crypt Damage	Involvement	Total Score		Scoring System
A	1	3	2	3	3	2	3	2	21	6 day	Inflammation	0	None
B	1	3	2	2	3	2	3	2	19			1	Slight
C	1	3	2	3	3	2	2	2	19			2	Moderate
D	1	3	2	3	3	3	3.5	3	28.5	7 day		3	Severe
E	2	3	2	3	3	3	4	3	33		Extent	0	None
F	3	3	3	3	2	3	4	3	36			1	Mucosa
G	1	3	2	2	3	1	3	1	13	5 day		2	Mucosa and submucosa
H	1	2	2	2	3	1	2	1	11			3	Transmural
I	2	2	2	2	3	2	3	2	28		Regeneration	3	No tissue repair
J	0	0	0	0	0	0	0	0	0	control		2	Minimal regenerative change
K	0	0	0	0	0	0	0	0	0			1	Partial regeneration of gland
L	0	0	0	0	0	0	0	0	0			0	Complete regeneration or normal tissue
M	2	1	2	1	2	1	2	1	8	4 day	Crypt Damage	0	None
N	3	3	3	3	2	3	4	3	36			1	Basal 1/3 damaged
O	3	1	3	1	2	1	4	1	12			2	Basal 2/3 damaged
												3	Only surface epithelium intact
												4	Entire crypt and epithelium lost
											Involvement	0	None
	Total score = BxC + DxE + FxG + HxI											1	up to 1/3 of the section
	Possible score Range = 0 - 39											2	1/3 to 2/3 of the section
												3	2/3 of the section to diffuse
	**Involvement score for regeneration given based on crypt damage
