# Supplementary material for: Expanding the utility of the dextran sulfate sodium (DSS) mouse model to induce a clinically relevant loss of intestinal barrier function
Source: PeerJ. 2020 Mar 10;8:e8681. doi: 10.7717/peerj.8681 (PMC7069414; doi:10.7717/peerj.8681)
Supplement: Supplemental Information 2 [file peerj-08-8681-s002.xlsx]

## Sheet: 1) No DSS control
Weight (g)			Animal #1	2	3	4	5	6
	date	day	Tail #1	2	3	4	5	6	water in bottle (mL)	replenish water (y/n)	date	observation time	N/K
	2018-03-06	0	15.4	16.4	18.5	16.9	16.8	17.4	100	y	2018-03-06	10:00:00	Nick
	2018-03-07	1	15.6	16.2	18.2	16.8	17.4	17.2	86	n	2018-03-07	10:00:00	Nick
	2018-03-08	2	15.2	16.3	18.7	17.2	17.2	17.1	69.5	y	2018-03-08	10	Kyle
	2018-03-09	3	15.8	16.8	18.9	17	17.1	17.1	85	n	2018-03-09	10	Kyle
	2018-03-10	4	15.7	16.6	18.7	17.1	17.6	17.1	67	y	2018-03-10	1300	Kyle
	2018-03-11	5	15.8	16.8	18.7	17.2	17.5	16.9	83	n	2018-03-11	13:00:00	Nick
	2018-03-12	6	15.8	17	18.8	17.1	17.8	17.2	59	y	2018-03-12	11:00:00	Nick
	2018-03-13	7	15.9	17	19.1	17.2	17.8	17.5	85	y, fresh water	2018-03-13	930	Both
	2018-03-14	8	15.6	16.5	18.9	16.8	17.7	17.5	83	n	2018-03-14	1000	Kyle
	2018-03-15	9	15.8	17	19	17.3	17.6	17.4	63	y	2018-03-15	10:30:00	Nick
	2018-03-16	10	15.7	16.9	18.9	17.6	17.5	17.5	85	n	2018-03-16	09:30:00	Both
	2018-03-17	11	16.1	16.8	18.7	17.5	17.6	17.4	70	y	2018-03-17	930	Kyle
	2018-03-18	12	15.9	17	18.8	17.3	17.6	17.5	80	n	2018-03-18	12:15:00	Nick
	2018-03-19	13	16.1	17.4	18.9	17.7	17.7	17.6	65	y	2018-03-19	10:00:00	Kyle
	2018-03-20	14	16.6	17.6	19.3	18.1	18.1	17.7	80	n	2018-03-20	09:30:00	Both
Weight % to Day 0			mouse
		day	1	2	3	4	5	6	Average
		0	100	100	100	100	100	100	100
		1	101.299	98.7805	98.3784	99.4083	103.571	98.8506	100.048
		2	98.7013	99.3902	101.081	101.775	102.381	98.2759	100.267
		3	102.597	102.439	102.162	100.592	101.786	98.2759	101.309
		4	101.948	101.22	101.081	101.183	104.762	98.2759	101.412
		5	102.597	102.439	101.081	101.775	104.167	97.1264	101.531
		6	102.597	103.659	101.622	101.183	105.952	98.8506	102.311
		7	103.247	103.659	103.243	101.775	105.952	100.575	103.075
		8	101.299	100.61	102.162	99.4083	105.357	100.575	101.568
		9	102.597	103.659	102.703	102.367	104.762	100	102.681
		10	101.948	103.049	102.162	104.142	104.167	100.575	102.674
		11	104.545	102.439	101.081	103.55	104.762	100	102.73
		12	103.247	103.659	101.622	102.367	104.762	100.575	102.705
		13	104.545	106.098	102.162	104.734	105.357	101.149	104.008
		14	107.792	107.317	104.324	107.101	107.738	101.724	105.999
Fecal Score			mouse
		day	1	2	3	4	5	6	Average
		0	0	0	0	0	0	0	0
		1	0	0	0	1	0	0	0.166667
		2	0	0	0	0	0	0	0
		3	0	0	0	0	0	0	0		criteria
		4	0	0	0	0	0	0	0		0 = solid stool, negative hemoccult
		5	0	0	0	0	0	0	0		1 = soft or runny stool, negative hemoccult
		6	0	0	0	0	1	0	0.166667		OR solid stool with positive hemoccult
		7	0	0	0	0	0	0	0		2 = soft stool, positive hemoccult
		8	0	0	0	0	0	0	0		3 = runny or mucusy stool, positive hemoccult
		9	0	0	0	0	0	0	0		4 = visible rectal bleeding
		10	0	0	0	0	0	0	0
		11	0	0	0	0	0	0	0
		12	0	0	0	0	0	0	0
		13	0	0	0	0	0	0	0
		14	0	0	0	0	0	0	0

## Sheet: 2) 7Day DSS
Weight (g)			Animal #7	8	9	10	11	12
	date	day	Tail #1	2	3	4	5	6	DSS in bottle (mL)	replenish DSS (y/n)
	2018-03-06	0	17.7	17.3	17.5	17.4	17	17.9	100	y
	2018-03-07	1	17.4	17.3	17.6	17	16.8	17.4	82	n
	2018-03-08	2	17	17.3	18	16.7	16.5	17.2	63	y
	2018-03-09	3	17.3	17.5	17.8	16.9	17	17.3	78.5	n
	2018-03-10	4	17.1	17.2	17	16.7	16.7	16.9	60	y
	2018-03-11	5	16	15.7	16.2	16	16.2	16.1	87	n
	2018-03-12	6	15	15.4	15.2	15.7	14.7	15.6	62	y
	2018-03-13	7	15	14.4	13.8	14.1	13.6	15	92	y, fresh water
	2018-03-14	8	13.9	13	12.6	12.2	12.6	13.6	94.5	n
	2018-03-15	9	13.2	12.2	Found Dead	12.2	12.1	12.6	86	y
	2018-03-16	10	12.2	11.7		10.8	11.1	12.4	97	n
	2018-03-17	11	Early Sacrifice
	2018-03-18	12
	2018-03-19	13
	2018-03-20	14
Weight % to Day 0			mouse
		day	1	2	3	4	5	6	Average
		0	100	100	100	100	100	100	100
		1	98.3051	100	100.571	97.7011	98.8235	97.2067	98.768
		2	96.0452	100	102.857	95.977	97.0588	96.0894	98.0046
		3	97.7401	101.156	101.714	97.1264	100	96.648	99.0642
		4	96.6102	99.422	97.1429	95.977	98.2353	94.4134	96.9668
		5	90.3955	90.7514	92.5714	91.954	95.2941	89.9441	91.8184
		6	84.7458	89.0173	86.8571	90.2299	86.4706	87.1508	87.4119
		7	84.7458	83.237	78.8571	81.0345	80	83.7989	81.9455
		8	78.5311	75.1445	72	70.1149	74.1176	75.9777	74.3143
		9	74.5763	70.5202	Found Dead	70.1149	71.1765	70.3911	71.3558
		10	68.9266	67.6301		62.069	65.2941	69.2737	66.6387
		11	Early Sacrifice
		12
		13
		14
Fecal Score			mouse
		day	1	2	3	4	5	6	Average
		0	0	0	0	0	0	0	0
		1	0	0	0	1	0	0	0.166667
		2	1	1	1	2	2	2	1.5
		3	2	1	2	2	2	1	1.66667		criteria
		4	2	2	2	2	2	2	2		0 = solid stool, negative hemoccult
		5	2	3	3	3	2	3	2.66667		1 = soft or runny stool, negative hemoccult
		6	3	3	4	3	4	3	3.33333		OR solid stool with positive hemoccult
		7	4	4	4	3	3	4	3.66667		2 = soft stool, positive hemoccult
		8	3	3	4	4	3	3	3.33333		3 = runny or mucusy stool, positive hemoccult
		9	2	3	Found Dead	3	3	3	2.8		4 = visible rectal bleeding
		10	3	2		4	3	3	3
		11	Early Sacrifice
		12
		13
		14

## Sheet: 3) 6Day DSS
Weight (g)			Animal #13	14	15	16	17	18
	date	day	Tail #1	2	3	4	5	6	DSS in bottle (mL)	replenish DSS (y/n)
	2018-03-06	0
	2018-03-07	1	17.9	17.3	16.9	15.1	18.3	17.1	100	y
	2018-03-08	2	17.9	17	16.1	15	18.5	17	84.5	n
	2018-03-09	3	17.7	16.9	16.2	15.5	18.5	17.1	65.5	y
	2018-03-10	4	18.2	16.8	16.2	15.4	18.4	16.9	81	n
	2018-03-11	5	17.8	16.6	16	15.6	18.4	17.1	63	y
	2018-03-12	6	17.3	15.8	16	14.7	17.5	16.2	77	n
	2018-03-13	7	16.4	15	15.3	13.3	16.6	15.8	66	y, fresh water
	2018-03-14	8	14.9	13.3	14	11.9	14.8	14.3	93	n
	2018-03-15	9	13.9	12.2	13.1	Found Dead	14	13.5	85	y
	2018-03-16	10	13.3	11.4	12.2		13.4	13.2	93	n
	2018-03-17	11	Early Sacrifice
	2018-03-18	12
	2018-03-19	13
	2018-03-20	14
Weight % to Day 0			mouse
		day	1	2	3	4	5	6	Average
		0
		1	100	100	100	100	100	100	100
		2	100	98.2659	95.2663	99.3377	101.093	99.4152	98.8963
		3	98.8827	97.6879	95.858	102.649	101.093	100	99.3617
		4	101.676	97.1098	95.858	101.987	100.546	98.8304	99.3346
		5	99.4413	95.9538	94.6746	103.311	100.546	100	98.9879
		6	96.648	91.3295	94.6746	97.351	95.6284	94.7368	95.0614
		7	91.6201	86.7052	90.5325	88.0795	90.7104	92.3977	90.0076
		8	83.2402	76.8786	82.8402	78.8079	80.8743	83.6257	81.0445
		9	77.6536	70.5202	77.5148	Found Dead	76.5027	78.9474	76.2278
		10	74.3017	65.896	72.1893		73.224	77.193	72.5608
		11	Early Sacrifice
		12
		13
		14
Fecal Score			mouse
		day	1	2	3	4	5	6	Average
		0
		1	0	0	0	0	0	0	0
		2	1	1	2	1	1	1	1.16667
		3	2	1	2	2	2	2	1.83333		criteria
		4	2	1	0	1	2	2	1.33333		0 = solid stool, negative hemoccult
		5	1	2	1	1	0	2	1.16667		1 = soft or runny stool, negative hemoccult
		6	2	3	2	2	3	3	2.5		OR solid stool with positive hemoccult
		7	4	4	4	3	4	4	3.83333		2 = soft stool, positive hemoccult
		8	3	4	3	4	3	3	3.33333		3 = runny or mucusy stool, positive hemoccult
		9	3	4	2	Found Dead	3	2	2.8		4 = visible rectal bleeding
		10	3	4	3		3	3	3.2
		11	Early Sacrifice
		12
		13
		14

## Sheet: 4) 5Day DSS
Weight (g)			Animal #19	20	21	22	23	24
	date	day	Tail #1	2	3	4	5	6	DSS in bottle (mL)	replenish DSS (y/n)
	2018-03-06	0
	2018-03-07	1
	2018-03-08	2	16	19.5	18	18.9	18.4	19.3	100	y
	2018-03-09	3	16.2	19.7	17.3	18.4	18.7	19.2	81	n
	2018-03-10	4	16.7	19.7	18	18.4	18.8	18.7	59.5	y
	2018-03-11	5	16.7	20.1	17.9	18.4	19.2	19	80	n
	2018-03-12	6	16.6	19.7	17.2	17.8	19.3	18.9	60	y
	2018-03-13	7	16	18.8	16.2	17.1	18.6	18.1	85	y, fresh water
	2018-03-14	8	14.9	17.3	14.3	15	17.4	16.6	92	n
	2018-03-15	9	13.7	16.1	13.2	13.5	15.2	15.6	81	y
	2018-03-16	10	12.9	15.3	12.4	12.5	13.7	14.8	93	n
	2018-03-17	11	Early Sacrifice
	2018-03-18	12
	2018-03-19	13
	2018-03-20	14
Weight % to Day 0			mouse
		day	1	2	3	4	5	6	Average
		0
		1
		2	100	100	100	100	100	100	100
		3	101.25	101.026	96.1111	97.3545	101.63	99.4819	99.4756
		4	104.375	101.026	100	97.3545	102.174	96.8912	100.303
		5	104.375	103.077	99.4444	97.3545	104.348	98.4456	101.174
		6	103.75	101.026	95.5556	94.1799	104.891	97.9275	99.555
		7	100	96.4103	90	90.4762	101.087	93.7824	95.2926
		8	93.125	88.7179	79.4444	79.3651	94.5652	86.0104	86.8713
		9	85.625	82.5641	73.3333	71.4286	82.6087	80.829	79.3981
		10	80.625	78.4615	68.8889	66.1376	74.4565	76.6839	74.2089
		11	Early Sacrifice
		12
		13
		14
Fecal Score			mouse
		day	1	2	3	4	5	6	Average
		0
		1
		2	0	0	0	0	0	0	0
		3	0	0	0	2	1	1	0.666667		criteria
		4	1	1	2	2	0	2	1.33333		0 = solid stool, negative hemoccult
		5	1	0	1	1	1	1	0.833333		1 = soft or runny stool, negative hemoccult
		6	1	2	2	1	1	2	1.5		OR solid stool with positive hemoccult
		7	3	3	4	3	3	3	3.16667		2 = soft stool, positive hemoccult
		8	3	2	3	3	2	3	2.66667		3 = runny or mucusy stool, positive hemoccult
		9	3	2	3	3	4	2	2.83333		4 = visible rectal bleeding
		10	3	3	3	3	3	3	3
		11	Early Sacrifice
		12
		13
		14

## Sheet: 5) 4Day DSS
Weight (g)			Animal #25	26	27	28	29	30
	date	day	Tail #1	2	3	4	5	6	DSS in bottle (mL)	replenish DSS (y/n)
	2018-03-06	0
	2018-03-07	1
	2018-03-08	2
	2018-03-09	3	17.6	16.9	19.1	17.3	19.2	17.2	100	y
	2018-03-10	4	17.6	16.8	19.1	17	18.7	15.8	79	n
	2018-03-11	5	18.5	17.2	19.3	16.6	19.6	16.8	56	y
	2018-03-12	6	18.5	17.6	19.5	17.6	19.9	17.5	79	n
	2018-03-13	7	17.8	17.6	19.6	17.1	19.7	17.4	62	y, fresh water
	2018-03-14	8	16.8	16.3	18.5	15.6	18.4	16.5	87	n
	2018-03-15	9	16.4	14.8	17.7	14.6	17.2	15.4	77	y
	2018-03-16	10	16.6	14.2	17.4	14	16.3	14.9	90	n
	2018-03-17	11	16.8	13.5	16.7	13.5	15.5	14.4	78.5	y
	2018-03-18	12	16.6	13.6	16.9	13.7	15.3	14.7	83	n
	2018-03-19	13	16.4	14.3	17.5	13.9	15	15.7	--	y
	2018-03-20	14	17	15.7	18.4	14.6	16.7	16.8	78	n
Weight % to Day 0			mouse
		day	1	2	3	4	5	6	Average
		0
		1
		2
		3	100	100	100	100	100	100	100
		4	100	99.4083	100	98.2659	97.3958	91.8605	97.8217
		5	105.114	101.775	101.047	95.9538	102.083	97.6744	100.608
		6	105.114	104.142	102.094	101.734	103.646	101.744	103.079
		7	101.136	104.142	102.618	98.8439	102.604	101.163	101.751
		8	95.4545	96.4497	96.8586	90.1734	95.8333	95.9302	95.1166
		9	93.1818	87.574	92.6702	84.3931	89.5833	89.5349	89.4895
		10	94.3182	84.0237	91.0995	80.9249	84.8958	86.6279	86.9817
		11	95.4545	79.8817	87.4346	78.0347	80.7292	83.7209	84.2093
		12	94.3182	80.4734	88.4817	79.1908	79.6875	85.4651	84.6028
		13	93.1818	84.6154	91.623	80.3468	78.125	91.2791	86.5285
		14	96.5909	92.8994	96.3351	84.3931	86.9792	97.6744	92.4787
Fecal Score			mouse
		day	1	2	3	4	5	6	Average
		0
		1
		2
		3	0	0	0	0	0	0	0		criteria
		4	1	1	1	1	2	0	1		0 = solid stool, negative hemoccult
		5	0	1	0	2	0	1	0.666667		1 = soft or runny stool, negative hemoccult
	moved this up from day 7, double check its correct	6	1	2	1	2	1	1	1.33333		OR solid stool with positive hemoccult
		7	2	1	1	1	1	2	1.33333		2 = soft stool, positive hemoccult
		8	2	3	2	3	3	2	2.5		3 = runny or mucusy stool, positive hemoccult
		9	3	1	3	3	3	3	2.66667		4 = visible rectal bleeding
		10	3	3	3	3	3	3	3
		11	2	3	2	3	2	3	2.5
		12	1	3	1	2	1	3	1.83333
		13	1	1	1	2	1	1	1.16667
		14	0	1	0	1	1	1	0.666667

## Sheet: colon length, spleen weight
	mouse (in group)	mouse (overall)	colon length (mm)	spleem mass (mg)
	No DSS control
	1	1	66	0.06
	2	2	76	0.0672
	3	3	68	0.0682
	4	4	75	0.0797
	5	5	78	0.0769
	6	6	76	0.0972
	7Day DSS
	1	7	51	0.0329
	2	8	42	0.0354
	3	9	Found Dead
	4	10	42	0.0256
	5	11	48	0.0502
	6	12	54	0.0359
	6Day DSS
	1	13	55	0.0465
	2	14	39	0.0457
	3	15	50	0.0417
	4	16	Found Dead
	5	17	47	0.0475
	6	18	45	0.0463
	5Day DSS
	1	19	51	0.0712
	2	20	53	0.0599
	3	21	49	0.034
	4	22	48	0.0375
	5	23	54	0.0575
	6	24	50	0.0448
	4Day DSS
	1	25	62	0.093
	2	26	58	0.1137
	3	27	63	0.1234
	4	28	55	0.0785
	5	29	60	0.1274
	6	30	60	0.1241

## Sheet: cutoff weights
		Animals must be sacrified when they reach this weight.
			Animal #1	2	3	4	5	6
		day	Tail #1	2	3	4	5	6
		0	15.4	16.4	18.5	16.9	16.8	17.4
		cuttof weight	10.78	11.48	12.95	11.83	11.76	12.18
			Animal #7	8	9	10	11	12
		day	Tail #1	2	3	4	5	6
		0	17.7	17.3	17.5	17.4	17	17.9
		cuttof weight	12.39	12.11	12.25	12.18	11.9	12.53
			Animal #13	14	15	16	17	18
		day	Tail #1	2	3	4	5	6
		1	17.9	17.3	16.9	15.1	18.3	17.1
		cuttof weight	12.53	12.11	11.83	10.57	12.81	11.97
			Animal #19	20	21	22	23	24
		day	Tail #1	2	3	4	5	6
		2	16	19.5	18	18.9	18.4	19.3
		cuttof weight	11.2	13.65	12.6	13.23	12.88	13.51
			Animal #25	26	27	28	29	30
		day	Tail #1	2	3	4	5	6
		3	17.6	16.9	19.1	17.3	19.2	17.2
		cuttof weight	12.32	11.83	13.37	12.11	13.44	12.04

## Sheet: avg weightloss
		7 day DSS									6 day DSS									5 day DSS									4 day DSS
	percent initial body weight	day	1	2	3	4	5	6			day	1	2	3	4	5	6			day	1	2	3	4	5	6			day	1	2	3	4	5	6
		0	100	100	100	100	100	100			0									0									0
		1	98.3051	100	100.571	97.7011	98.8235	97.2067			1	100	100	100	100	100	100			1									1
		2	96.0452	100	102.857	95.977	97.0588	96.0894			2	100	98.2659	95.2663	99.3377	101.093	99.4152			2	100	100	100	100	100	100			2
		3	97.7401	101.156	101.714	97.1264	100	96.648			3	98.8827	97.6879	95.858	102.649	101.093	100			3	101.25	101.026	96.1111	97.3545	101.63	99.4819			3	100	100	100	100	100	100
		4	96.6102	99.422	97.1429	95.977	98.2353	94.4134			4	101.676	97.1098	95.858	101.987	100.546	98.8304			4	104.375	101.026	100	97.3545	102.174	96.8912			4	100	99.4083	100	98.2659	97.3958	91.8605
		5	90.3955	90.7514	92.5714	91.954	95.2941	89.9441			5	99.4413	95.9538	94.6746	103.311	100.546	100			5	104.375	103.077	99.4444	97.3545	104.348	98.4456			5	105.114	101.775	101.047	95.9538	102.083	97.6744
		6	84.7458	89.0173	86.8571	90.2299	86.4706	87.1508			6	96.648	91.3295	94.6746	97.351	95.6284	94.7368			6	103.75	101.026	95.5556	94.1799	104.891	97.9275			6	105.114	104.142	102.094	101.734	103.646	101.744
		7	84.7458	83.237	78.8571	81.0345	80	83.7989			7	91.6201	86.7052	90.5325	88.0795	90.7104	92.3977			7	100	96.4103	90	90.4762	101.087	93.7824			7	101.136	104.142	102.618	98.8439	102.604	101.163
		8	78.5311	75.1445	72	70.1149	74.1176	75.9777			8	83.2402	76.8786	82.8402	78.8079	80.8743	83.6257			8	93.125	88.7179	79.4444	79.3651	94.5652	86.0104			8	95.4545	96.4497	96.8586	90.1734	95.8333	95.9302
		9	74.5763	70.5202	Dead	70.1149	71.1765	70.3911			9	77.6536	70.5202	77.5148	Dead	76.5027	78.9474			9	85.625	82.5641	73.3333	71.4286	82.6087	80.829			9	93.1818	87.574	92.6702	84.3931	89.5833	89.5349
		10	68.9266	67.6301		62.069	65.2941	69.2737			10	74.3017	65.896	72.1893		73.224	77.193			10	80.625	78.4615	68.8889	66.1376	74.4565	76.6839			10	94.3182	84.0237	91.0995	80.9249	84.8958	86.6279
																													11	95.4545	79.8817	87.4346	78.0347	80.7292	83.7209
		day									day									day									12	94.3182	80.4734	88.4817	79.1908	79.6875	85.4651
		0									0									0									13	93.1818	84.6154	91.623	80.3468	78.125	91.2791
		1									1									1									14	96.5909	92.8994	96.3351	84.3931	86.9792	97.6744
		2									2									2
		3									3									3									day
		4									4									4									0
		5	6.21469	8.67052		4.02299	2.94118	4.46927			5									5									1
		6	5.64972	1.7341		1.72414	8.82353	2.7933			6	2.7933	4.62428	0		4.91803	5.26316			6									2
		7	0	5.78035		9.1954	6.47059	3.35196			7	5.02793	4.62428	4.14201		4.91803	2.33918			7	3.75	4.61538	5.55556	3.7037	3.80435	4.14508			3
		8	6.21469	8.09249		10.9195	5.88235	7.82123			8	8.37989	9.82659	7.69231		9.83607	8.77193			8	6.875	7.69231	10.5556	11.1111	6.52174	7.77202			4
		9									9	5.58659	6.35838	5.32544		4.37158	4.67836			9	7.5	6.15385	6.11111	7.93651	11.9565	5.18135			5
		10									10									10	5	4.10256	4.44444	5.29101	8.15217	4.14508			6
																													7
	average		4.51977	6.06936		6.46552	6.02941	4.60894				5.44693	6.35838	4.28994		6.01093	5.26316				5.78125	5.64103	6.66667	7.01058	7.6087	5.31088			8	5.68182	7.69231	5.75916	8.67052	6.77083	5.23256
																													9	2.27273	8.87574	4.18848	5.78035	6.25	6.39535
																													10	1.13636	3.5503	1.57068	3.46821	4.6875	2.90698
																													11	1.13636	4.14201	3.66492	2.89017	4.16667	2.90698
																													12
																													13
																													14
																													average	2.55682	6.06509	3.79581	5.20231	5.46875	4.36047
