# Supplementary material for: Expanding the utility of the dextran sulfate sodium (DSS) mouse model to induce a clinically relevant loss of intestinal barrier function
Source: PeerJ. 2020 Mar 10;8:e8681. doi: 10.7717/peerj.8681 (PMC7069414; doi:10.7717/peerj.8681)
Supplement: Supplemental Information 3 [file peerj-08-8681-s003.xlsx]

## Sheet: Day 7
Software Version	2.01.14
Experiment File Path:
Protocol File Path:	C:\Users\Public\Documents\Protocols\FITC-Dextran NL.prt
Plate Number	Plate 1
Date	2018-03-13
Time	17:21:11
Reader Type:	Synergy H1
Reader Serial Number:	258595
Reading Type	Reader
Procedure Details
Plate Type	96 WELL PLATE
Read	FITC Medium Gain
	Fluorescence Endpoint
	Full Plate
	Filter Set 1
	Excitation: 494, Emission: 521
	Optics: Top, Gain: 75
	Light Source: Xenon Flash, Lamp Energy: High
	Read Speed: Normal, Delay: 100 msec, Measurements/Data Point: 10
	Read Height: 7 mm
FITC Medium Gain:494,521
Actual Temperature:	23.2
		1	2	3	4	5	6	7	8	9	10	11	12				Calibration Curve
Box 1	A	525	537	538	474	597	514							FITC Medium Gain:494,521			FLU	ug/mL FD4
Box 2	B	3063	2981	4521	12930	3805	2556							FITC Medium Gain:494,521			12628	24.9896
Box 3	C	5348	3231	3855	3137	4382	3111							FITC Medium Gain:494,521			2140	3.56994
Box 4	D	1185	950	1052	1482	1458	1344							FITC Medium Gain:494,521			392	0
Box 5	E	637	743	646	726	915	1980							FITC Medium Gain:494,521
	F													FITC Medium Gain:494,521
	G													FITC Medium Gain:494,521
calibration	H	OVRFLW	OVRFLW	78583	12628	2140	392							FITC Medium Gain:494,521
ug/ml FD4	60000	8571.43	1224.49	174.927	24.9896	3.56994	0
		raw FLU	FD4 ug/mL
	Box 1 (PBS)	525	0.27
		537	0.29448
		538	0.29652
		474	0.16596
		597	0.41688
		514	0.24756
	Box 2 (7 Day)	3063	5.44752
		2981	5.28024
		4521	8.42184
		12930	25.5762
		3805	6.9612
		2556	4.41324
	Box 3 (6 Day)	5348	10.1089
		3231	5.79024
		3855	7.0632
		3137	5.59848
		4382	8.13828
		3111	5.54544
	Box 4 (5 Day)	1185	1.6164
		950	1.137
		1052	1.34508
		1482	2.22228
		1458	2.17332
		1344	1.94076
	Box 5 (4 Day)	637	0.49848
		743	0.71472
		646	0.51684
		726	0.68004
		915	1.0656
		1980	3.2382

## Sheet: Day 10
		1	2	3	4	5	6	7	8	9	10	11	12
	A	956	525	756	877	790	681							FITC Medium Gain:494,521			Calibration Curve
	B	18527	OVRFLW	209	OVRFLW	OVRFLW	OVRFLW							FITC Medium Gain:494,521			FLU	FD4 ug/mL
	C	5751	28208	2752	204	3816	651							FITC Medium Gain:494,521			35366.5	60
	D	1510	1842	12941	3472	2705	2063							FITC Medium Gain:494,521			4935.5	6
	E	1739	6568	2097	1788	3165	4118							FITC Medium Gain:494,521			877.5	0.6
	F													FITC Medium Gain:494,521			402.5	0
	G	4335	20855	178	45800	17716	20804	<-- Serum from Box 2 (7 Day) diluted 10 fold and re-run						FITC Medium Gain:494,521
calibration	H	OVRFLW	OVRFLW	34772	35961	5005	4866	899	856	373	427	395	415	FITC Medium Gain:494,521
	mg/mL FD4	600	600	60	60	6	6	0.6	0.6	0	0	0	0
		raw FLU	FD4 ug/mL	Adjusted FD4 (7 Day only)
	Box 1 (PBS)	956	0.72348
		525	0.15025
		756	0.45748
		877	0.61841
		790	0.5027
		681	0.35773
	Box 2 (7 Day)	4335	5.21755	52.1755
		20855	27.1891	271.891
		45800	60.366	603.66
		17716	23.0143	230.143
		20804	27.1213	271.213
	Box 3 (6 Day)	5751	7.10083
		28208	36.9686
		2752	3.11216
		3816	4.52728
		651	0.31783
	Box 4 (5 Day)	1510	1.4603
		1842	1.90186
		12941	16.6635
		3472	4.06976
		2705	3.04965
		2063	2.19579
	Box 5 (4 Day)	1739	1.76487
		6568	8.18744
		2097	2.24101
		1788	1.83004
		3165	3.66145
		4118	4.92894

## Sheet: Day 14
		1	2	3	4	5	6	7	8	9	10	11	12				Calibration
	A	484	457	413	487	277	707							FITC Medium Gain:494,521			FLU	ug/mL FD4
	B													FITC Medium Gain:494,521			3063	6
	C	556	574	873	372	659	1137							FITC Medium Gain:494,521			686	0.6
	D													FITC Medium Gain:494,521			373	0
	E													FITC Medium Gain:494,521			395	0
	F													FITC Medium Gain:494,521			323	0
	G													FITC Medium Gain:494,521
calibration	H	OVRFLW	OVRFLW	25874	3063	686	373	395	323					FITC Medium Gain:494,521
ug/mL FD4			600 ug/ml	60	6	0.6	0	0	0
		raw FLU	FD4 ug/mL
	Box 1 (PBS)	484	0.99572
		457	0.93551
		413	0.83739
		487	1.00241
		277	0.53411
		707	1.49301
	Box 1 (PBS)	556	1.15628
		574	1.19642
		873	1.86319
		372	0.74596
		659	1.38597
		1137	2.45191
